# Supplementary material
Source: publisher figshare collection journal article supplement (https://gsapubs.figshare.com/ndownloader/files/28153281)
Supplement: Supplementary file 1 [file 28153281]

## Sheet: Sheet1
Sample/ppm	AL082-3	AL082-1	AL082-2	AL031-3	AL104-1	AL055-4	AL057-2	ReAL031-3-1	ReAL082-2-1
Li	10.2	3.98	2.89	12.7	16.2	42.16	13.11	11.7	3.07
Be	4.31	2.3	2.18	4.17	1.79	7.42	29.89	4.29	2.37
Sc	13.1	7.52	0.3	0.31	1	3.52	1.1	0.27	0.34
V	89.5	27.1	1.75	1.39	10.4	5.78	2.3	1.47	2.06
Cr	69.6	3.25	0.33	0.75	0.41	0.71	0.58	0.41	0.36
Co	13.7	1.44	0.3	0.52	1.36	0.66	0.3	0.56	0.32
Ni	33.9	1.78	0.52	1.3	0.89	0.37	0.4	1.06	0.54
Cu	6.16	11.2	4.12	11	3.39	7.32	17.9	10.9	3.98
Zn	68.8	23.3	2.26	6.14	36.5	32.01	14.36	6.26	2.41
Ga	21.4	15.7	17	18.7	15.8	25.41	29.59	18.3	17.3
Rb	113	135	148	149	307	377.86	191.57	159	149
Sr	673	1123	966	1925	239	127.44	63.1	1940	973
Y	25.1	24.1	1.26	3.16	6.93	18.32	17.98	3.05	1.22
Zr	86.8	213	27.6	15.6	109	87.58	16.03	12.8	29.1
Nb	12.7	15.7	0.13	1.12	1.83	23.43	16.23	1.12	0.13
Sn	2.49	1.93	0.045	0.18	1.83	4.57	0.85	0.15	0.043
Cs	1.08	0.62	0.77	2.3	4.15	12.15	23.13	2.27	0.74
Ba	1467	4076	2333	2536	934	389.45	31.32	2518	2402
La	41.5	36.3	1.39	3.09	39.6	28.32	4.45	3.07	1.39
Ce	80.2	67.2	1.85	4.72	69.7	50.63	7.36	4.58	1.88
Pr	9.01	7.33	0.17	0.57	6.9	5.28	0.78	0.52	0.16
Nd	34.2	27.3	0.57	2.22	22.1	17.77	2.78	2.09	0.58
Sm	6.55	5.55	0.12	0.56	3.27	3.63	0.98	0.51	0.11
Eu	1.43	1.47	0.69	0.59	0.6	0.52	0.21	0.58	0.71
Gd	5.29	4.81	0.081	0.49	2.17	3.08	1.33	0.51	0.09
Tb	0.8	0.76	0.012	0.079	0.29	0.5	0.34	0.078	0.013
Dy	4.48	4.4	0.11	0.47	1.32	3.04	2.42	0.47	0.11
Ho	0.87	0.81	0.034	0.09	0.22	0.52	0.49	0.078	0.027
Er	2.31	2.2	0.1	0.27	0.58	1.49	1.53	0.26	0.09
Tm	0.34	0.31	0.014	0.041	0.087	0.21	0.27	0.033	0.017
Yb	2.26	1.86	0.11	0.24	0.49	1.4	1.89	0.24	0.1
Lu	0.31	0.25	0.021	0.038	0.072	0.2	0.25	0.034	0.018
Hf	2.43	5.69	1.36	0.53	3.02	3.18	0.96	0.41	1.51
Ta	0.81	1.44	0.016	0.17	0.13	2.36	4.05	0.19	0.022
Tl	0.63	0.72	0.75	0.82	1.69	2.34	1.02	0.77	0.78
Pb	18.9	29.1	43.9	50	48.1	49.71	30.1	49.2	45.4
Th	15.3	23.4	0.099	0.65	16.6	29.31	4.67	0.72	0.1
U	2.74	2.06	0.34	1.18	0.52	6.44	13.29	1.33	0.52
ΣREE	189.62	160.51	5.28	13.46	147.47	116.6	25.07	13.06	5.3
Eu/Eu*	0.72	0.85	20.17	3.36	0.65	0.47	0.56	3.46	22.26
Note: Eu/Eu*=2*EuN/(SmN+GdN), N denotes chondrite-normalized.
ΣREE= La+Ce+Pr+Nd+Sm+Eu+Gd+Tb+Dy+Ho+Er+Tm+Yb+Lu
